# Supplementary material
Source: HighWire-hosted journal article supplement (https://jnis.bmj.com/content/15/8/781)
Supplement: inline-supplementary-material-1 [file inline-supplementary-material-1.pdf]

**SUPPLEMENTAL MATERIAL****Table 1** Study eligibility criteria

|                                                                                                                                                                                                                                                                                                                                                                                                                                                                                                                                                                                                                                                                                                                                                                                                                                        |
|----------------------------------------------------------------------------------------------------------------------------------------------------------------------------------------------------------------------------------------------------------------------------------------------------------------------------------------------------------------------------------------------------------------------------------------------------------------------------------------------------------------------------------------------------------------------------------------------------------------------------------------------------------------------------------------------------------------------------------------------------------------------------------------------------------------------------------------|
| <p>Inclusion criteria</p> <ul style="list-style-type: none"><li>• Subject age <math>\geq 18</math> and <math>\leq 80</math> years with a diagnosis of a ruptured or unruptured intracranial aneurysm judged suitable for selective endovascular treatment by coil occlusion during single procedure.</li><li>• Aneurysm size [largest measurement from the cross-sectional images to determine overall aneurysm size, not just the lumen] <math>\geq 5</math> mm and <math>\leq 16</math>mm.</li><li>• If ruptured aneurysm: either World Federation of Neurosurgical Societies (WFNS) grade 1 or 2, or Hunt and Hess 1 or 2.</li><li>• If unruptured aneurysm: Subject grade Modified Rankin Scale (mRS) 0 – 2.</li><li>• Investigator plans to use <math>\geq 70\%</math> in volume Trellix coils to fill target aneurysm.</li></ul> |
| <p>Exclusion criteria</p> <ul style="list-style-type: none"><li>• Prior treatment (surgical or endovascular) of the target aneurysm.</li><li>• Planned treatment of multiple aneurysms in index procedure.</li><li>• Planned use of other modified coils (Matrix, HydroCoil, or fibered coils).</li><li>• Planned use of liquid embolic material.</li><li>• Life expectancy less than 12 months.</li><li>• Presence of arteriovenous malformation.</li><li>• Fusiform, mycotic, traumatic, or tumoral aneurysms.</li><li>• Intended or planned aneurysm treatment by parent vessel occlusion.</li><li>• Clipping or endovascular treatment of another intracranial aneurysm performed within 30 days before or planned within 30 days following the index procedure.</li></ul>                                                         |

**Table 2** Embolization coil specifics

| Aneurysm                                     | Coil manufacturer | Coil description              | Diameter | Length | TX-PE volume    | Volume          |
|----------------------------------------------|-------------------|-------------------------------|----------|--------|-----------------|-----------------|
|                                              |                   |                               | mm       | cm     | mm <sup>3</sup> | mm <sup>3</sup> |
| C6 segment of the right ICA                  | SMM               | TrelliX                       | 14       | 20     | 39.1            | 148.5           |
|                                              | SMM               | TrelliX                       | 14       | 20     | 39.1            | 148.5           |
|                                              | SMM               | TrelliX                       | 11       | 20     | 40.1            | 153.6           |
|                                              | SMM               | TrelliX                       | 11       | 20     | 40.1            | 153.6           |
|                                              | SMM               | TrelliX                       | 10       | 20     | 20.3            | 78.1            |
|                                              | SMM               | TrelliX                       | 9        | 20     | 20.5            | 79.4            |
| C6 segment of the left ICA                   | Medtronic         | Axium Prime 3D Super Soft     | 6        | 15     | -               | 10.1            |
|                                              | SMM               | TrelliX                       | 5        | 15     | 16.0            | 62.1            |
|                                              | SMM               | TrelliX                       | 3        | 4      | 3.8             | 14.4            |
|                                              | Balt              | Optima Complex 10 Super Soft  | 2        | 6      | -               | 3.0             |
|                                              | Stryker           | Target 360 Nano               | 1.5      | 3      | -               | 1.5             |
| C6 segment of the left ICA <sup>a</sup>      | Balt              | Optima Complex Soft           | 6        | 11     | -               | 6.7             |
|                                              | SMM               | TrelliX                       | 3        | 8      | 8.4             | 32.7            |
|                                              | SMM               | TrelliX                       | 3        | 2      | 1.6             | 5.3             |
| C6 segment of the right ICA                  | MicroVention      | Cosmos Microplex 10           | 6        | 18     | -               | 13.1            |
|                                              | SMM               | TrelliX                       | 3        | 10     | 10.7            | 41.8            |
|                                              | SMM               | TrelliX                       | 3        | 2      | 1.6             | 5.3             |
| C6 segment of the left ICA                   | MicroVention      | Cosmos Microplex 10           | 5        | 15     | -               | 10.9            |
|                                              | SMM               | TrelliX                       | 3        | 4      | 3.8             | 14.4            |
|                                              | SMM               | TrelliX                       | 3        | 2      | 6.2             | 21.2            |
|                                              | SMM               | TrelliX                       | 3        | 2      | 6.2             | 21.2            |
|                                              | SMM               | TrelliX                       | 3        | 2      | 6.2             | 21.2            |
|                                              | SMM               | TrelliX                       | 3        | 2      | 6.2             | 21.2            |
|                                              | Balt              | Optima Complex 10 Super Soft  | 2        | 2      | -               | 1.0             |
| C6 segment of the right ICA <sup>b</sup>     | Balt              | Optima Complex 10 Soft        | 5        | 17     | -               | 8.6             |
|                                              | SMM               | TrelliX                       | 4        | 8      | 8.1             | 31.4            |
|                                              | MicroVention      | HyperSoft Helical             | 2.5      | 4      | -               | 2.0             |
| C6 segment of the left ICA                   | MicroVention      | Hypersoft Helical             | 4        | 8      | -               | 4.9             |
|                                              | SMM               | TrelliX                       | 3        | 6      | 6.1             | 23.6            |
| Posterior communicating artery, right        | Stryker           | Target 360 Soft               | 8        | 20     | -               | 10.1            |
|                                              | SMM               | TrelliX                       | 3        | 10     | 10.7            | 41.8            |
|                                              | SMM               | TrelliX                       | 3        | 6      | 6.1             | 23.6            |
|                                              | Stryker           | Target 360 Soft               | 3        | 6      | -               | 4.6             |
|                                              | Stryker           | Target 360 Soft               | 2        | 4      |                 |                 |
| Anterior cerebral artery A1-A2 segment, left | Balt              | Optima Complex 10 Standard    | 5        | 17     | -               | 12.4            |
|                                              | SMM               | TrelliX                       | 3        | 8      | 8.4             | 32.7            |
|                                              | SMM               | TrelliX                       | 3        | 4      | 7.7             | 28.9            |
|                                              | SMM               | TrelliX                       | 3        | 4      | 7.7             | 28.9            |
|                                              | Balt              | Optical Helical 10 Super Soft | 2        | 6      | -               | 3.0             |

Coils for each case are listed in the order implanted.

C6 segment of the ICA = ophthalmic segment of the internal carotid artery.

TX-PE Volume = Trellix Embolic Coil volume prior to the expansion of the shape memory polymer. Volume = Volume of the coil/Trellix Embolic Coil volume with expanded shape memory polymer.

TX-PE Volume and Volume were determined using the calculator at [www.angiocalc.com](http://www.angiocalc.com) in March 2022.

<sup>a</sup> Illustrated in Figure 3.

<sup>b</sup> Illustrated in Figure 2.

Coil manufacturers:

- Balt, Irvine, California, United States
- Medtronic, Dublin, Ireland
- MicroVention, Aliso Viejo, California, United States
- SMM = Shape Memory Medical, Santa Clara, California, United States
- Stryker, Fremont, California, United States
